# Supplementary material for: CoII, MnII and CuII-directed coordination polymers with mixed tetrazolate–dicarboxylate heterobridges exhibiting spin-canted, spin-frustrated antiferromagnetism and a slight spin-flop transition
Source: Royal Society of Chemistry journal article supplement (doi:10.1039/c1dt10958h), 2011-01-01
Supplement: c1dt10958h.pdf [file c1dt10958h.pdf]

## Electronic supplementary information

### $\text{Co}^{\text{II}}$ , $\text{Mn}^{\text{II}}$ and $\text{Cu}^{\text{II}}$ -directed coordination polymers with mixed tetrazolate-dicarboxylate heterobridges exhibiting spin-canted, spin-frustrated antiferromagnetism and a slight spin-flop transition

En-Cui Yang\*, Zhong-Yi Liu, Xiao-Yun Wu, Hong Chang, En-Chan Wang and Xiao-Jun Zhao\*

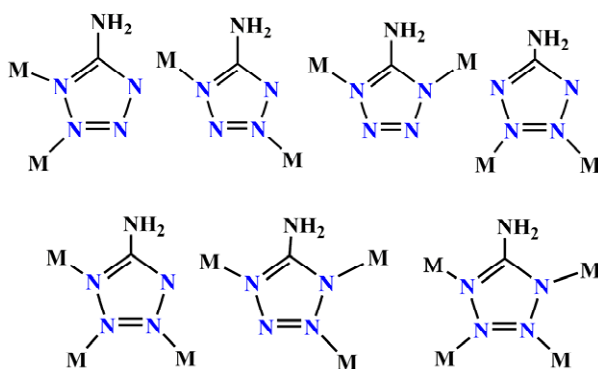

**Scheme S1** Possible binding modes of anionic atz<sup>-</sup> ligand.

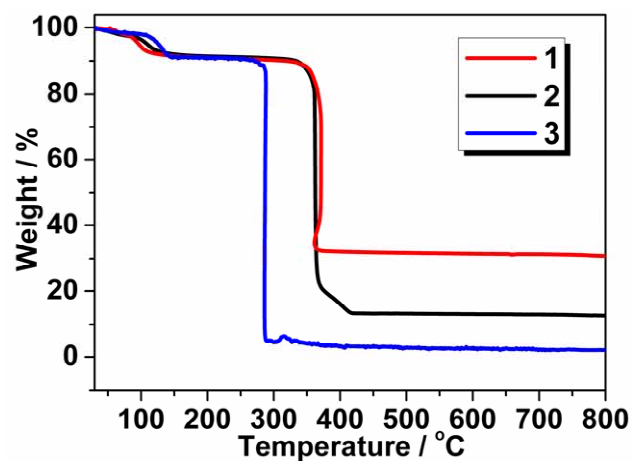

Fig. S1 TG curves for 1 – 3.

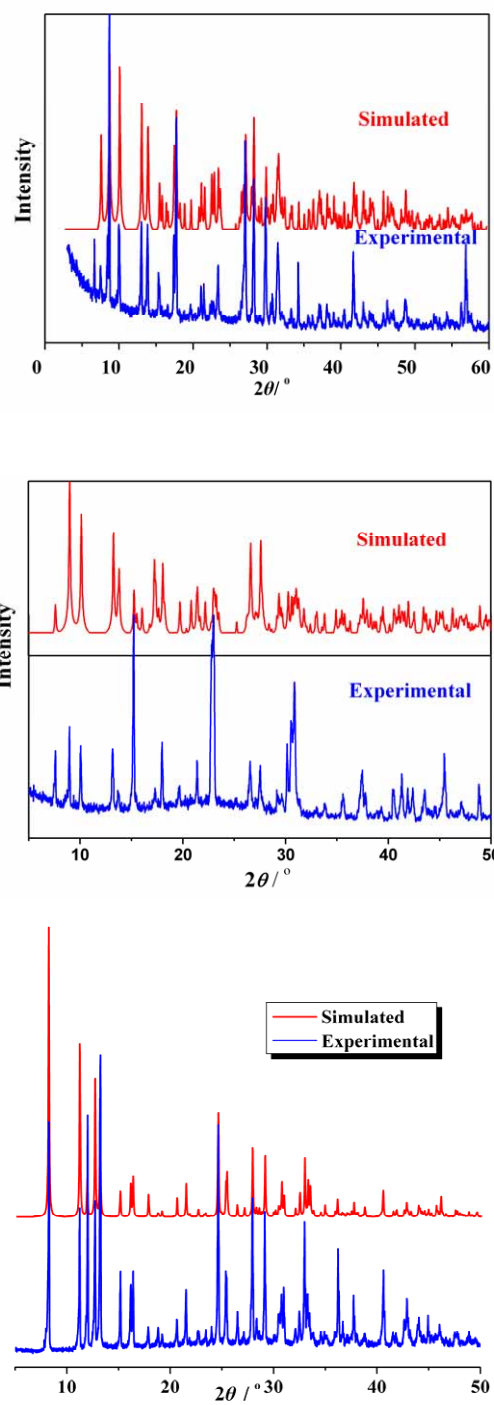

**Fig. S2** Simulated (red) and experimental (blue) X-ray powder diffraction patterns for **1 – 3**.

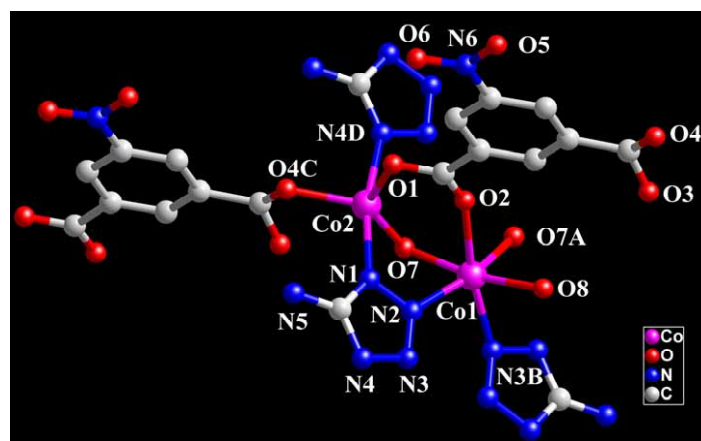

**Fig. S3** Local coordination environments of Co<sup>II</sup> atoms in **1** (Hydrogen atoms were omitted for clarity. Symmetry codes: A = 1 - x, 2 - y, 2 - z; B = 2 - x, 2 - y, 2 - z; C = x, 1 + y, z; D = x - 1, y, z).

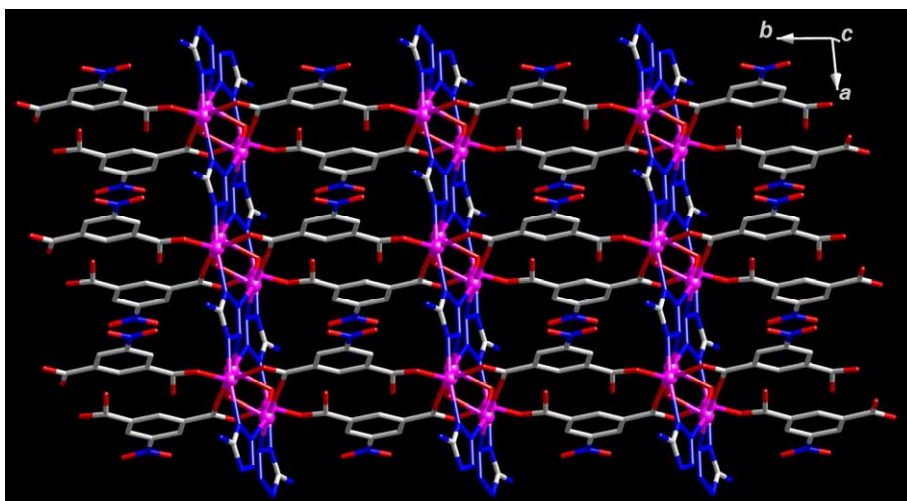

**Fig. S4** 2D covalent layer of **1** jointly extended by  $\text{atz}^-$  and  $\text{nip}^{2-}$  connectors (Terminal aqua ligands were omitted for clarity).

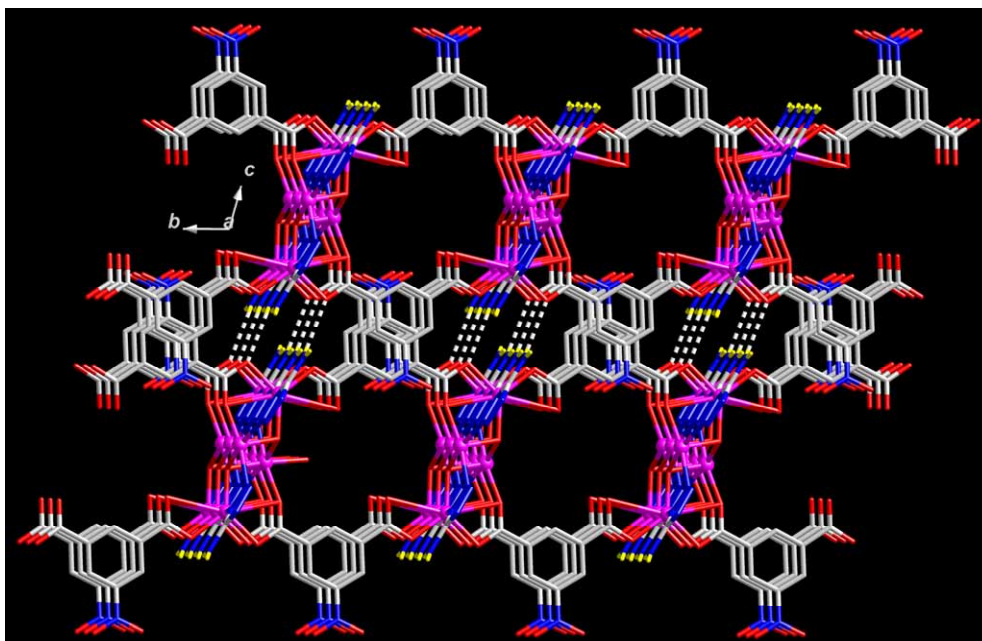

**Fig. S5** 3D supramolecular network of **1** formed by interlayer N–H...O hydrogen-bonding interactions.

**Table S1** Hydrogen-bonds distances (Å) and angles (°) for **1**<sup>a</sup>

| Donor – H···Acceptor            | D – H | H ··· A | D···A    | D –<br>H···A |
|---------------------------------|-------|---------|----------|--------------|
| N(5)–H(5B)···O(1) <sup>#1</sup> | 0.86  | 2.41    | 2.947(3) | 121          |

<sup>a</sup> Symmetry code: <sup>#1</sup> 1 – x, 2 – y, 1 – z.

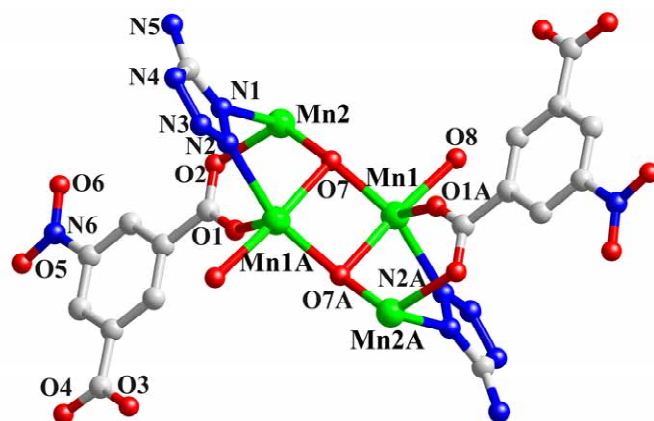

**Fig. S6** The SBU of **2** with atom-numbering scheme in the asymmetric unit (H atoms were omitted for clarity).  
Symmetry code: A = 1 - x, 1 - y, 1 - z).

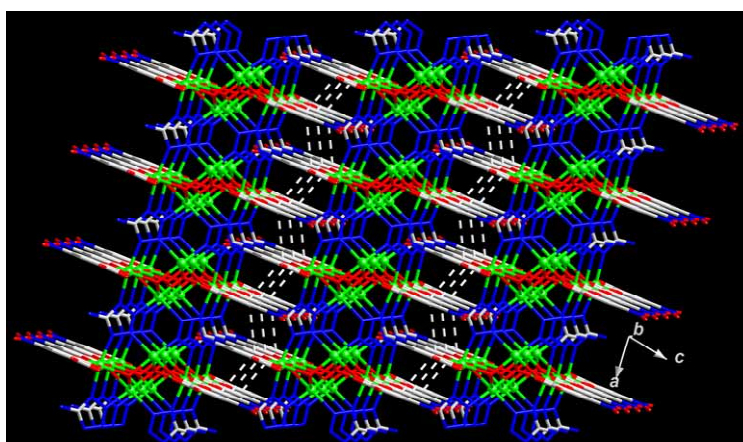

**Fig. S7** 3D supramolecular network of **2** formed by interlayer  $\pi \cdots \pi$  stacking interactions.



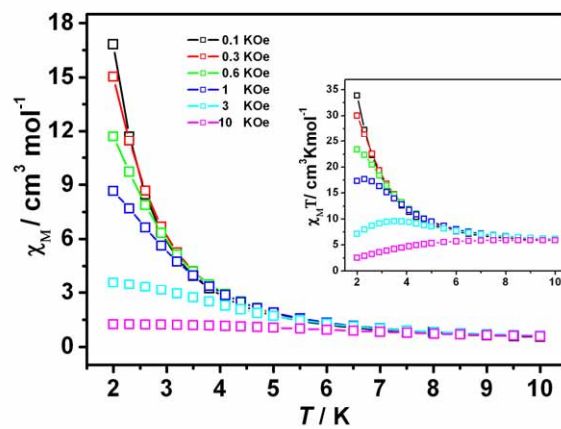

Fig. S8 Plots of  $\chi_M$  and  $\chi_M T$  vs  $T$  at different fields for **1**.

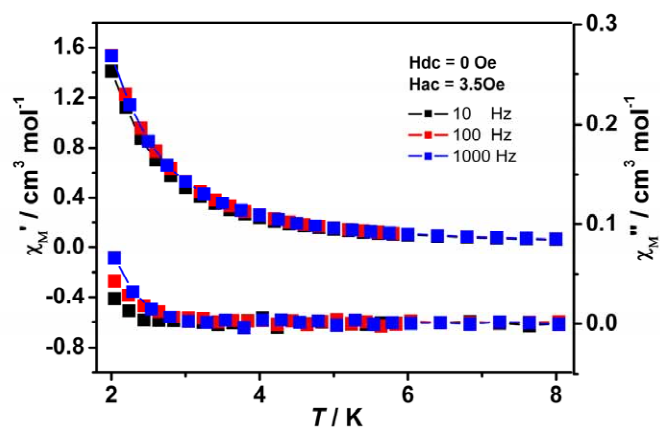

**Fig. S9** Real ( $\chi'$ ) and imaginary ( $\chi''$ ) *ac* magnetic susceptibilities in zero applied dc field and an ac field of 3.5 Oe at different frequencies for **1**.

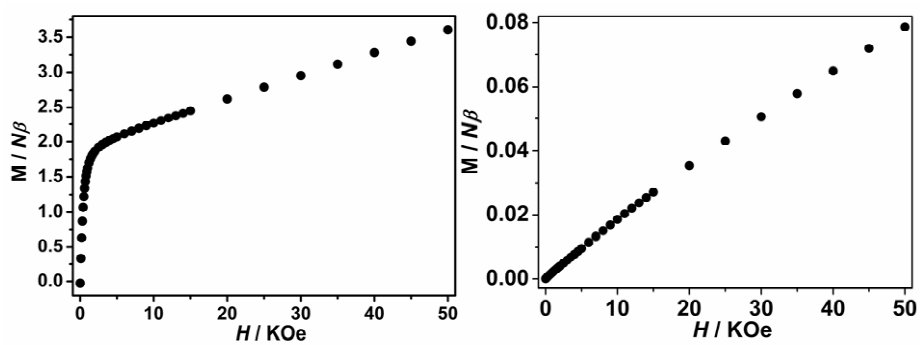

**Fig. S10** Field dependence of magnetization at 2 K for **1** (left) and **3** (right), respectively.

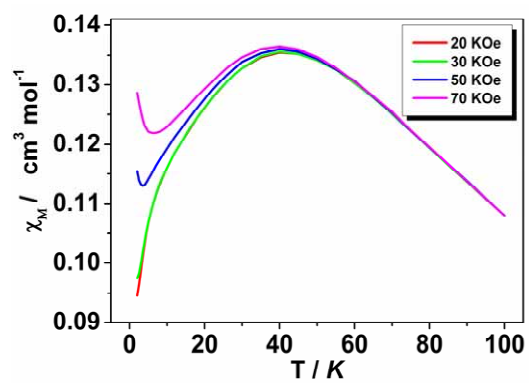

**Fig. S11** Temperature dependence of  $\chi_M$  for **2** under different dc fields.
